# Supplementary material for: Central Europe, 1531–1540 CE: The driest summer decade of the past five centuries?
Source: Copernicus journal article supplement (doi:10.5194/cp-16-2125-2020), 2020-11-09
Supplement: Supplementary file 1 [file cp-16-2125-2020-supplement.pdf]

Supplement of *Clim. Past*, 16, 2125–2151, 2020  
<https://doi.org/10.5194/cp-16-2125-2020-supplement>  
© Author(s) 2020. This work is distributed under  
the Creative Commons Attribution 4.0 License.

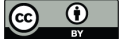

*Supplement of*

## **Central Europe, 1531–1540 CE: The driest summer decade of the past five centuries?**

**Rudolf Brázdil et al.**

*Correspondence to:* Rudolf Brázdil ([brazdil@sci.muni.cz](mailto:brazdil@sci.muni.cz))

The copyright of individual parts of the supplement might differ from the CC BY 4.0 License.

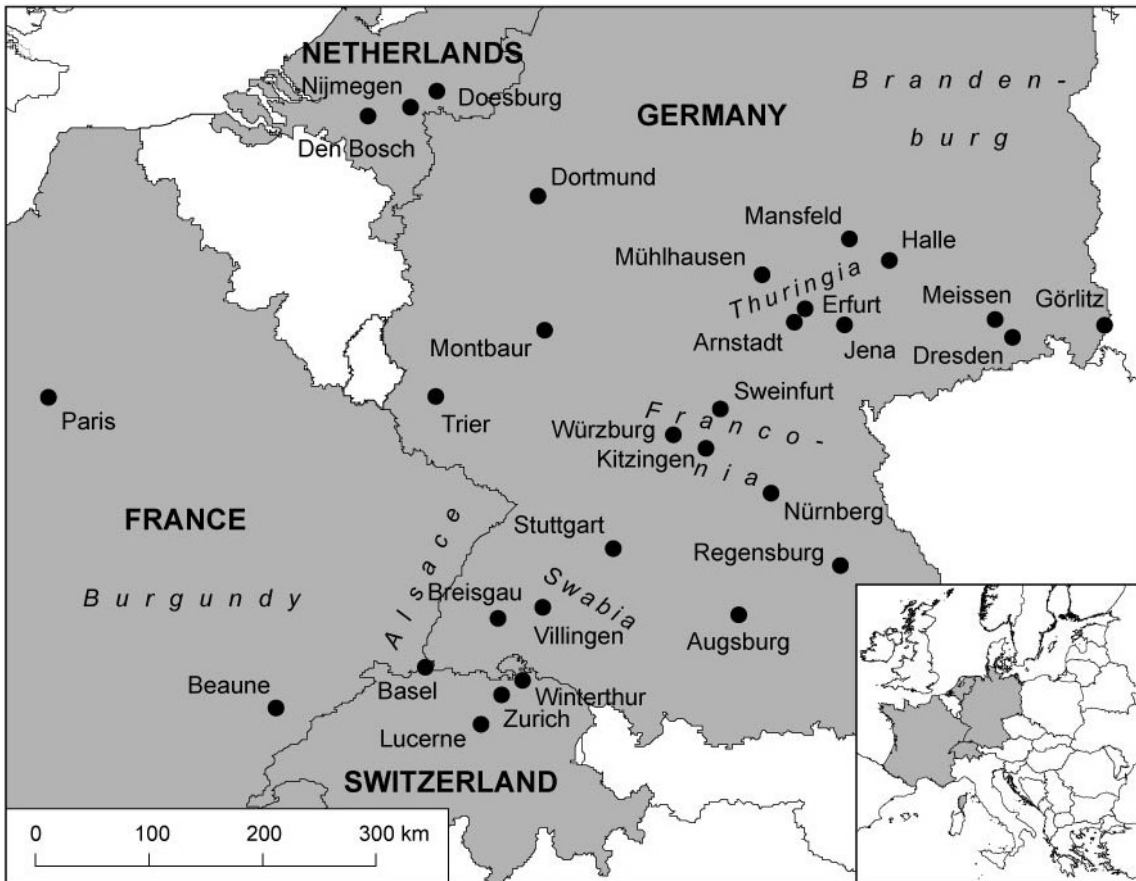

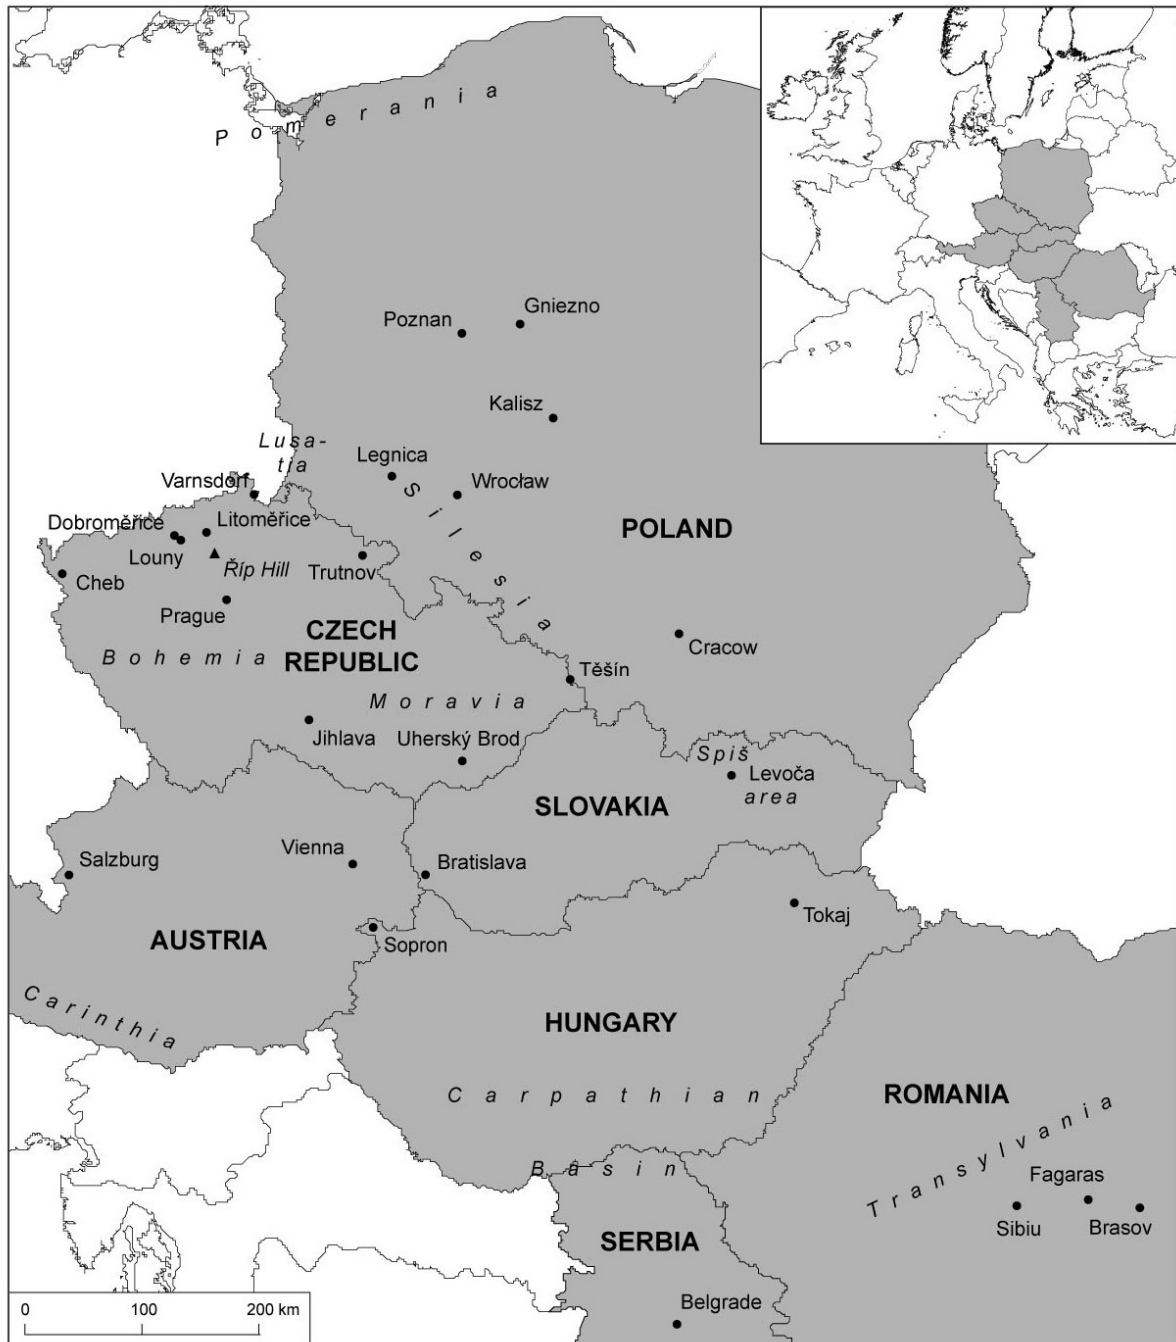

**Figure S1.** Locations in Europe reported by documentary data in this article
